# Supplementary material for: Survival of Skin Graft between Transgenic Cloned Dogs and Non-Transgenic Cloned Dogs
Source: PubMed Central journal article supplement (PMC4220905; doi:10.1371/journal.pone.0108330), 2014-11-05
Supplement: pone.0108330.s001.pdf [file pone.0108330.s001.pdf]

**Figure S1.**

**a**

|                        | DLA-88 | DLA-DRB1 | DLA-DQA1 | DLA-DQB1 |
|------------------------|--------|----------|----------|----------|
| Reference <sup>c</sup> | 00101  | 00101    | 00101    | 00101    |
| Co1                    | 00101  | 00101    | 05011    | 01201    |
| Co2                    | 01301  | 00101    | 00901    | 00101    |
| C1                     | 04301  | 10201    | 00101    | 02901    |
| C2                     | 04301  | 10201    | 00101    | 02901    |
| R1                     | 04301  | 10201    | 00101    | 02901    |
| R2                     | 04301  | 10201    | 00101    | 02901    |
| R3                     | 04301  | 10201    | 00101    | 02901    |
| R5                     | 04301  | 10201    | 00101    | 02901    |

**b**

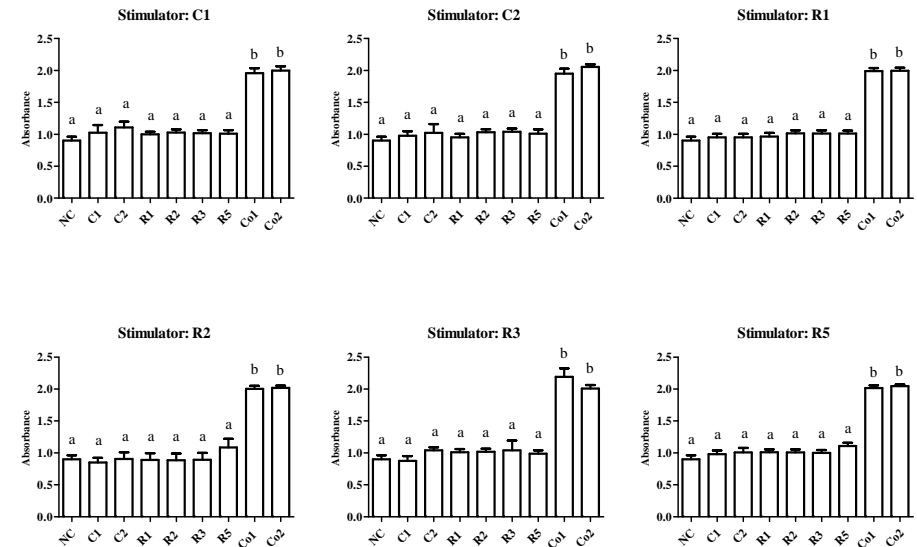

**c**

|      | DEA 1.0 | DEA 1.1 | DEA 1.2 | DEA 4 | DEA5 | DEA 7 | Blood type |
|------|---------|---------|---------|-------|------|-------|------------|
| Co 1 | P       | P       | N       | P     | N    | N     | 1.1, 4     |
| Co 2 | N       | N       | N       | P     | N    | N     | 4          |
| C1   | P       | P       | N       | P     | N    | N     | 1.1, 4     |
| C2   | P       | P       | N       | P     | N    | N     | 1.1, 4     |
| R1   | P       | P       | N       | P     | N    | N     | 1.1, 4     |
| R2   | P       | P       | N       | P     | N    | N     | 1.1, 4     |
| R3   | P       | P       | N       | P     | N    | N     | 1.1, 4     |
| R5   | P       | P       | N       | P     | N    | N     | 1.1, 4     |

**d**

|          | Serum |      |    |    |    |    |    |    |
|----------|-------|------|----|----|----|----|----|----|
|          | Co 1  | Co 2 | C1 | C2 | R1 | R2 | R3 | R5 |
| <b>R</b> | Co 1  | N    | P  | N  | N  | N  | N  | N  |
| <b>B</b> | Co 2  | N    | N  | N  | N  | N  | N  | N  |
| <b>C</b> | C1    | N    | P  | N  | N  | N  | N  | N  |
|          | C2    | N    | P  | N  | N  | N  | N  | N  |
|          | R1    | N    | P  | N  | N  | N  | N  | N  |
|          | R2    | N    | P  | N  | N  | N  | N  | N  |
|          | R3    | N    | P  | N  | N  | N  | N  | N  |
|          | R5    | N    | P  | N  | N  | N  | N  | N  |
