# Supplementary material for: Survival of Skin Graft between Transgenic Cloned Dogs and Non-Transgenic Cloned Dogs
Source: PubMed Central journal article supplement (PMC4220905; doi:10.1371/journal.pone.0108330), 2014-11-05

**Figure S4.**

Donor: R2  
Recipient: R3

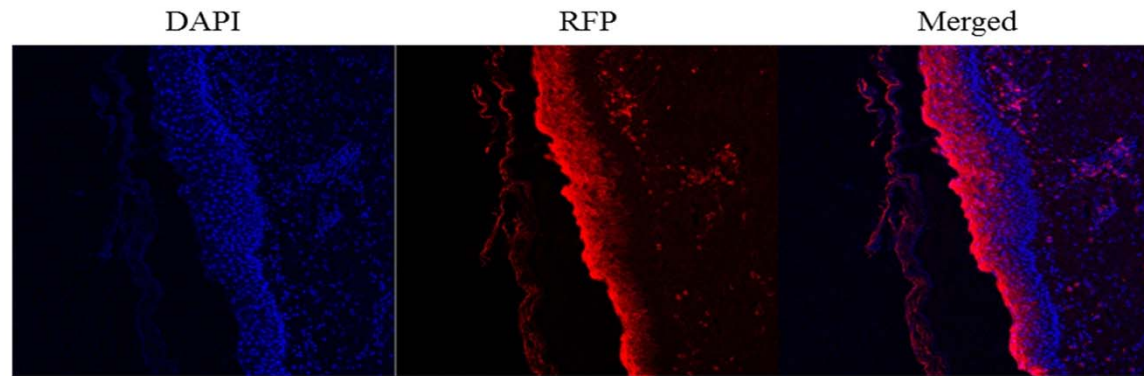

Donor: R2  
Recipient: R2

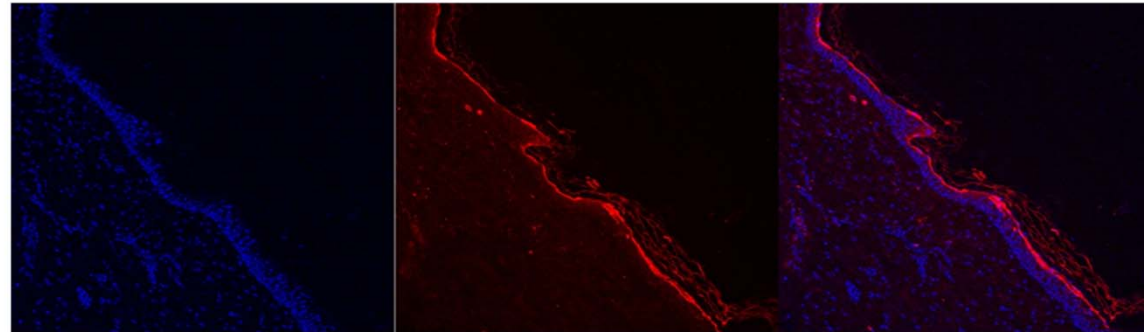

Donor: R3  
Recipient: R3

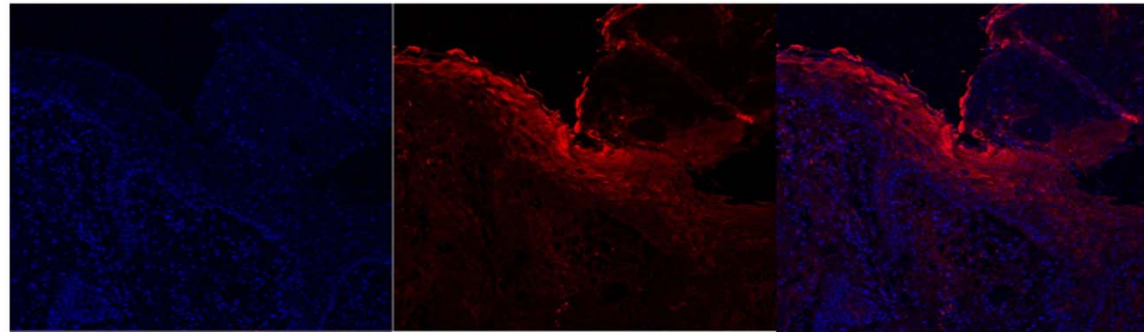

Donor: R3  
Recipient: R2

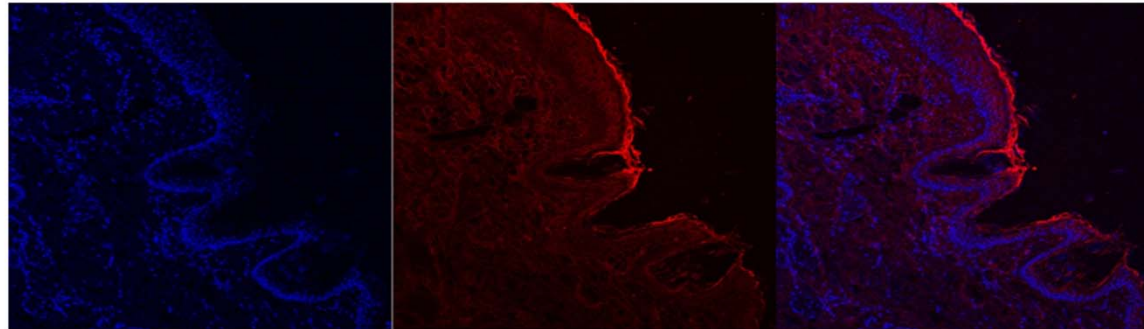

Supplement: pone.0108330.s004.pdf [file pone.0108330.s004.pdf]
