# Supplementary material for: Survival of Skin Graft between Transgenic Cloned Dogs and Non-Transgenic Cloned Dogs
Source: PubMed Central journal article supplement (PMC4220905; doi:10.1371/journal.pone.0108330), 2014-11-05
Supplement: pone.0108330.s005.pdf [file pone.0108330.s005.pdf]

**Table S1.**

---

| Marker                   | PEZ 01  | PEZ 02  | PEZ 05  | PEZ 17  | FH 2010 | FH 2054 | FH 2079 |
|--------------------------|---------|---------|---------|---------|---------|---------|---------|
| Non-TG somatic cells BF3 | 114/114 | 127/127 | 101/105 | 211/211 | 228/232 | 147/155 | 273/273 |
| Non-TG cloned C1         | 114/114 | 127/127 | 101/105 | 211/211 | 228/232 | 147/155 | 273/273 |
| Non-TG cloned C2         | 114/114 | 127/127 | 101/105 | 211/211 | 228/232 | 147/155 | 273/273 |
| TG somatic cells         | 114/114 | 127/127 | 101/105 | 211/211 | 228/232 | 147/155 | 273/273 |
| TG cloned R1             | 114/114 | 127/127 | 101/105 | 211/211 | 228/232 | 147/155 | 273/273 |
| TG cloned R2             | 114/114 | 127/127 | 101/105 | 211/211 | 228/232 | 147/155 | 273/273 |
| TG cloned R3             | 114/114 | 127/127 | 101/105 | 211/211 | 228/232 | 147/155 | 273/273 |
| TG cloned R5             | 114/114 | 127/127 | 101/105 | 211/211 | 228/232 | 147/155 | 273/273 |

---
