# Supplementary material for: Survival of Skin Graft between Transgenic Cloned Dogs and Non-Transgenic Cloned Dogs
Source: PubMed Central journal article supplement (PMC4220905; doi:10.1371/journal.pone.0108330), 2014-11-05
Supplement: pone.0108330.s006.pdf [file pone.0108330.s006.pdf]

**Table S2.**

---

| <b>ID</b>    | <b>Chromosome No.</b> | <b>Location</b>            |
|--------------|-----------------------|----------------------------|
| TG cloned R1 | 25                    | 5 M bp – 6Mbp intron       |
| TG cloned R2 | 25                    | 47.22Mbp - 47.23Mbp intron |
| TG cloned R3 | 2                     | 34.24-34.25Mbp intron      |
| TG cloned R5 | 2                     | 34.24-34.25Mbp intron      |

---
